# Supplementary material for: Inflammation-related microRNA alterations in epilepsy: a systematic review of human and animal studies
Source: publisher site journal article supplement (doi:10.1515/revneuro-2025-0041), 2025-08-04
Supplement: Supplementary file 1 [file j_revneuro-2025-0041_suppl_001.docx]

**Inflammation-Related microRNA Alterations in Epilepsy: A Systematic Review of Human and Animal Studies**

Mohammad Javad Yousefi1,2#, Ali Rezvanimehr3,8#, Kiarash Saleki6,1,2,9,8#, Aida Mehrani4, Erfan Barootchi5, Mohammad Ramezankhah1,2, Amirreza Mazloomi1,6, Abdolrahman Shams-Nateri6, Shayan Barootchi7, and Nima Rezaei8,9,10*

*1 Student Research Committee, Babol University of Medical Sciences, Babol, 4717647745, Iran.*

*2 USERN Office, Babol University of Medical Sciences, Babol,4717647745, Iran.*

*3 Faculty of Medicine, Tehran Medical Sciences Branch, Islamic Azad University, Tehran, 1651153311, Iran*

*4 Student Research Committee, Isfahan University of Medical Sciences, Isfahan, 81746-73461, Iran*

*5 Center for clinical Research and evidence synthesis In oral Tissue Regeneration (CRITERION), Ann Arbor, MI, 48104, USA and Boston, MA, USA.*

*6 Cancer Genetics & Stem Cell Group, The BioDiscovery Institute, University of Nottingham, Nottingham, NG7 2RD, UK.*

*7 Department of Oral Medicine, Infection, and Immunity, Division of Periodontology, Harvard School of Dental Medicine, Boston, MA, 48104, USA.*

*8 Network of Immunity in Infection, Malignancy and Autoimmunity (NIIMA), Universal Scientific Education and Research Network (USERN), Tehran, 1416634793, Iran.*

*9 Research Center for Immunodeficiencies, Children’s Medical Center, Tehran University of Medical Sciences, Tehran 1416634793, Iran.*

*10 Department of Immunology, School of Medicine, Tehran University of Medical Sciences, Tehran,1416634793, Iran.*

****Corresponding author***

Prof. Nima Rezaei, MD, PhD.

Professor of Clinical Immunology; Address: Tehran University of Medical Sciences, Children’s Medical Center Hospital, Dr. Qarib St, Keshavarz Blvd, Tehran 14194, Iran;

Tel: +9821‐ 6692‐9234; Fax: +9821‐6692‐9235;

E‐mail: [rezaei_nima@tums.ac.ir](mailto:rezaei_nima@tums.ac.ir), [rezaei_nima@yahoo.com](mailto:rezaei_nima@yahoo.com)

#Co-first authorship and contributed equally to the present work.

**Table S1**. Risk of Bias for human studies

| **F-Author** | **Case def.** | **Case repr.** | **Ctrl select.** | **Ctrl def.** | **Main conf.** | **Add. conf.** | **Expo. method** | **Same method** | **Non-resp.** | **Total** |
| --- | --- | --- | --- | --- | --- | --- | --- | --- | --- | --- |
| Xiaodong Cai (2020) | * | * | 0 | * | * | 0 | * | * | * | 7 |
| Guerra Leal, B. (2022) | * | * | 0 | * | * | 0 | * | * | * | 7 |
| Anatoly Korotkov (2020) | * | * | 0 | * | 0 | 0 | * | * | * | 6 |
| Anand Iyer (2012) | * | * | * | * | * | * | * | * | * | 9 |
| Yuehui Fan (2020 | * | * | 0 | * | 0 | 0 | * | * | * | 6 |
| Shu Ou  (2020) | * | * | 0 | * | * | 0 | * | * | * | 7 |
| Huajun Fu (2019) | * | * | 0 | * | * | * | * | * | * | 8 |
| Li-Gang Huang (2017) | * | * | 0 | * | 0 | 0 | * | 0 | * | 5 |
| Yifei Wu (2021) | * | * | * | * | * | 0 | * | * | * | 8 |
| YuKui Yan (2019) | 0 | 0 | 0 | * | 0 | 0 | * | * | * | 4 |
| Bizhou Bie (2021) | * | * | * | * | * | 0 | * | * | * | 8 |
| Muhammad Usman Ashhab (2013) | * | * | 0 | * | * | 0 | * | * | * | 7 |
| Prabowo (2015) | * | 0 | 0 | * | * | 0 | * | * | * | 6 |
| Zhiwei Huang (2024) | * | * | * | * | * | 0 | * | * | * | 8 |
| James D. Mills (2017) | * | * | 0 | * | * | 0 | * | * | * | 7 |
| Tao-Ran Li (2018) | * | * | 0 | * | * | 0 | * | * | * | 7 |
| Meng Fu (2020) | * | * | 0 | * | * | 0 | * | * | * | 7 |
| E. Aronica (2010) | * | * | 0 | * | * | * | * | * | * | 8 |
| Ahmed Omran (2012) | * | * | 0 | * | * | * | * | * | * | 8 |
| Anne A. Kan (2012) | * | * | 0 | * | * | 0 | * | * | * | 7 |

Abbreviations: **Add. conf**. = Additional confounding controlled, **Case def.** = Case definition adequate, **Case repr.** = Case representativeness, **Ctrl def.** = Control definition, **Ctrl select.** = Control selection, **Expo. method** = Exposure assessment method, **Main conf.** = Main confounding controlled, **Non-resp**. = Non-response rate, **Same method** = Same exposure method, **Total** = Total stars
